# Supplementary material for: The formulation and characterization of 3D printed grafts as vascular access for potential use in hemodialysis
Source: Royal Society of Chemistry journal article supplement (doi:10.1039/c8ra01583j), 2018-01-01
Supplement: c8ra01583j1.pdf [file c8ra01583j1.pdf]

## Supporting Information

**Title:** Formulation and characterization of 3D printed grafts as vascular access for potential use in hemodialysis

Bill Cheng, Yue-Min Xing, Nai-Chia Shih, Jen-Po Weng, Hsin-Chieh Lin\*

Dr. Bill Cheng, Yue-Min Hsing, Nai-Chia Shih, Jen-Po Weng, Prof. H.-C. Lin\*

Department of Materials Science and Engineering, National Chiao Tung University, Hsinchu, 30010, Taiwan, Republic of China

E-mail: [hclin45@nctu.edu.tw](mailto:hclin45@nctu.edu.tw)

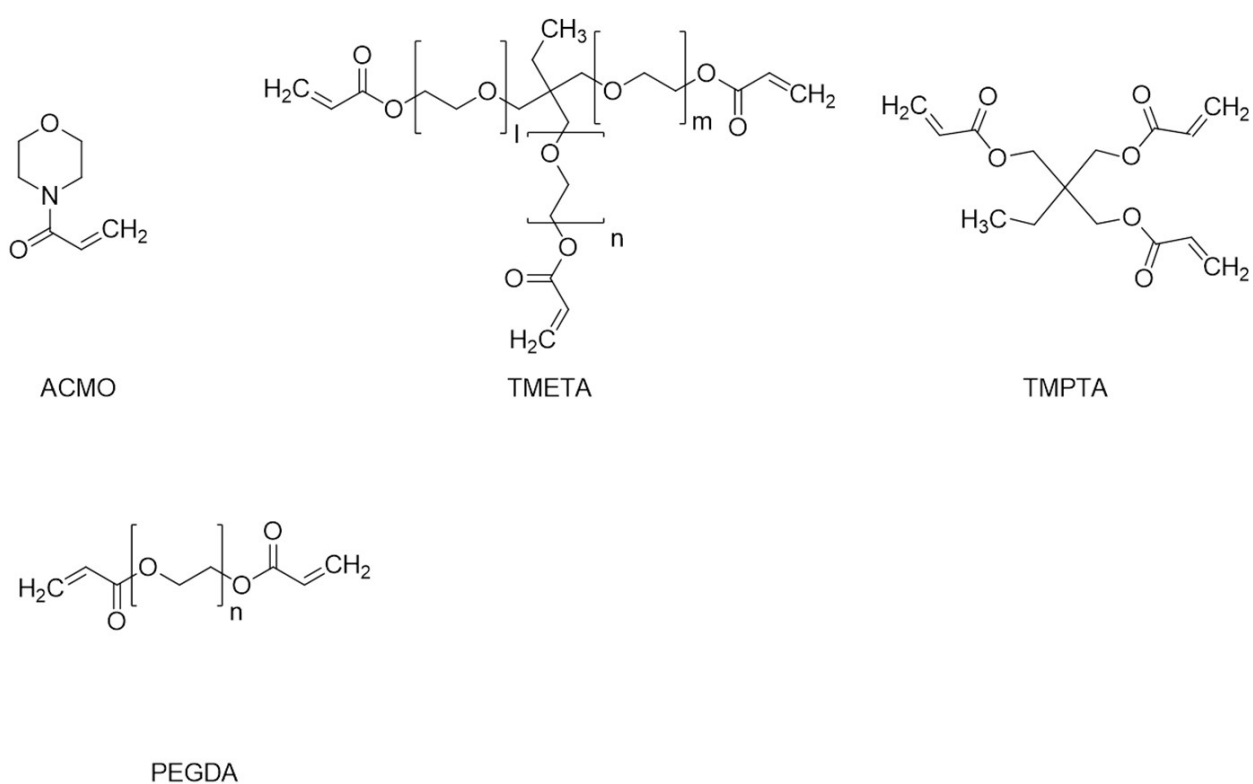

**Figure S1.** Chemical structures of the polymers used in fabricating the 3D printed AVG.

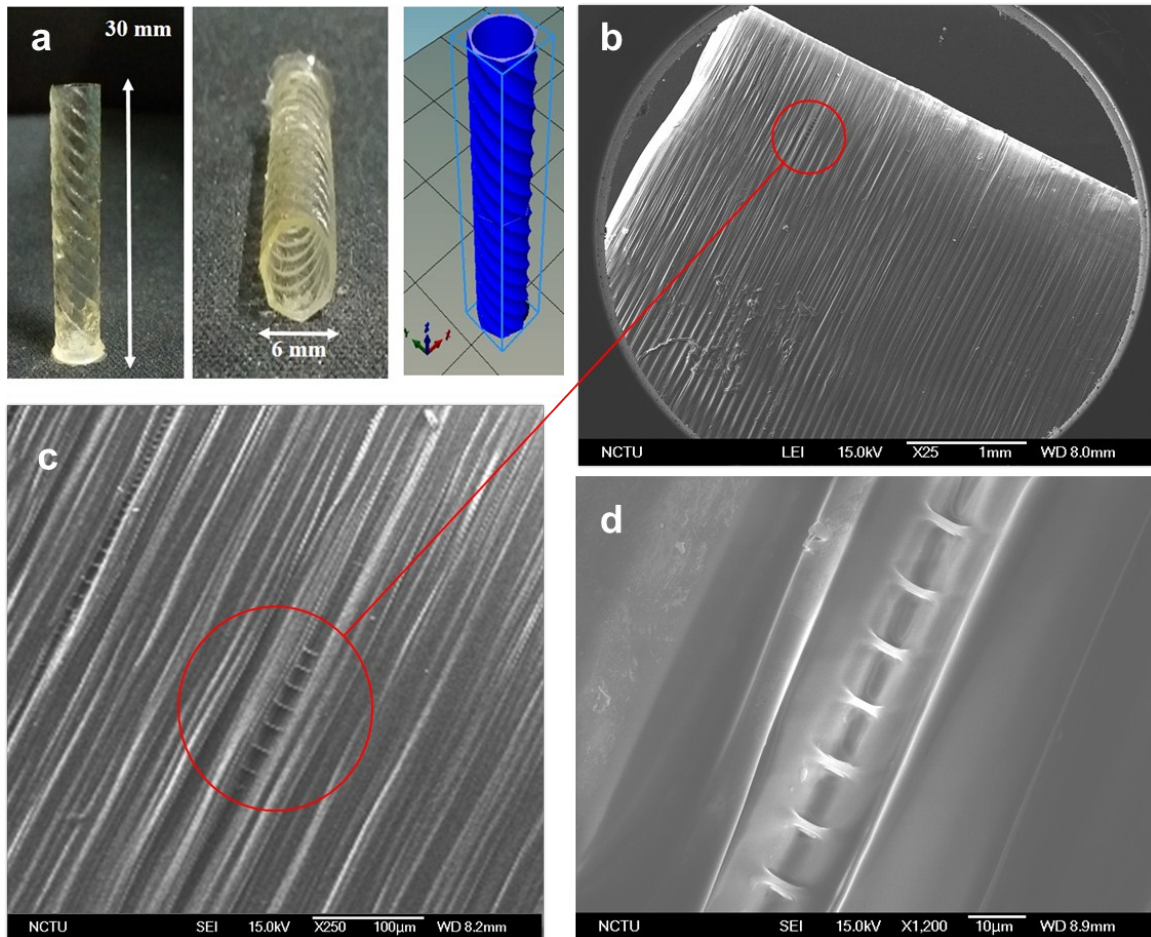

**Figure S2.** The PEDA ink formulation was 3D printed into (a) PEGDA-AVG with twisted outer rim. (b) SEM image at 25 $\times$ ; scale bar: 1 mm. (c) SEM image showed the small area contained layer splitting (red circle); scale bar: 10  $\mu\text{m}$ . (d) The amplified image of (c); scale bar: 100  $\mu\text{m}$

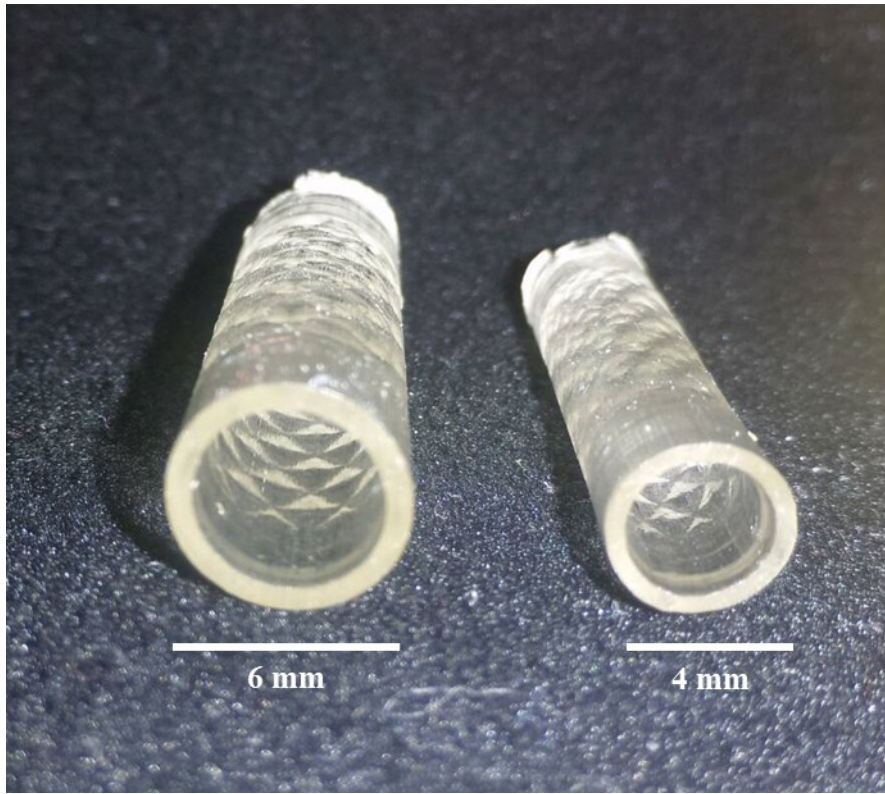

**Figure S3.** The 3D printed ACMO-AVG with different diameters.

**Culture Plate**

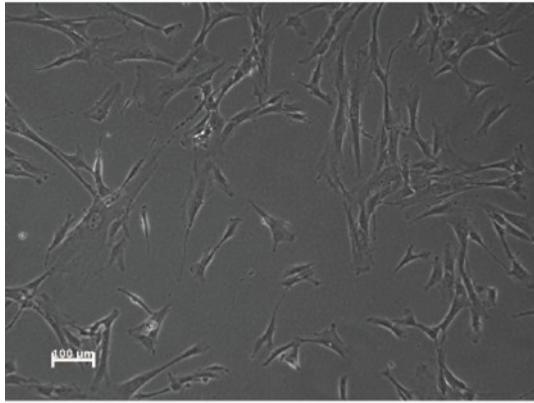

**ePTFE**

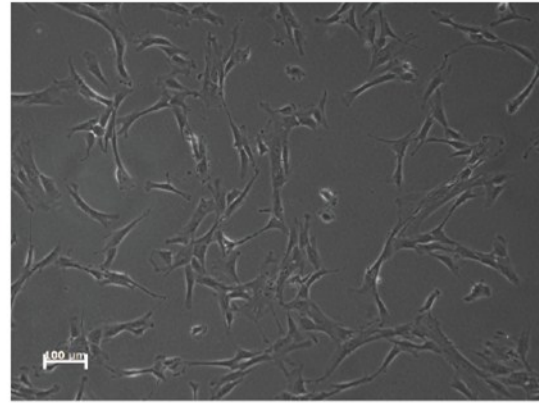

**ACMO**

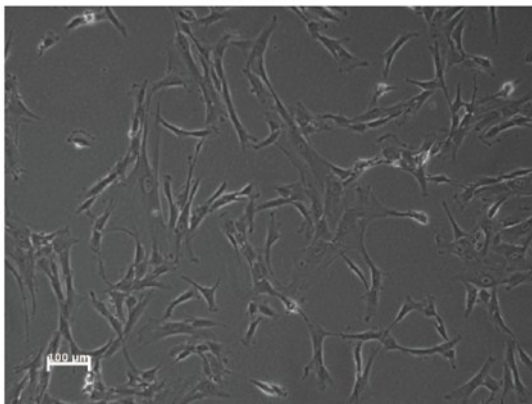

**PEGDA**

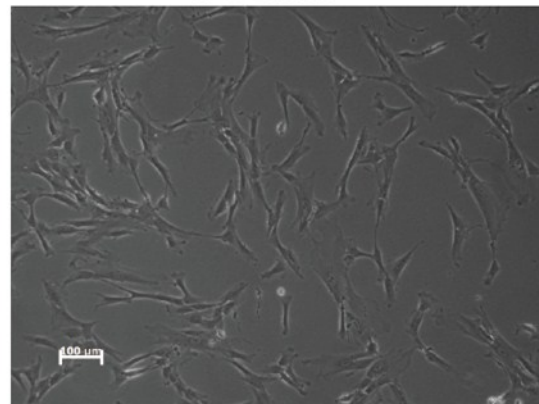

**Figure S4.** After being incubated in the culture media that had been pre-exposed to different AVG materials for 72 hour, the cell morphology of human skin fibroblast, WS1, in each incubated media was analysed with a light microscope.

**Table S1.** Summary of the ACMO-AVG with different outer rim design

| <b>Outer Rim Design</b> | <b>Splitting occurred during 3D printing</b> | <b>Layer splitting visible under TEM</b> | <b>Structurally stable after 3D printed</b> |
|-------------------------|----------------------------------------------|------------------------------------------|---------------------------------------------|
| Twisted                 | No                                           | No                                       | Yes                                         |
| Hexagonal               | Yes                                          | Yes                                      | No                                          |
| Cylindrical             | Yes                                          | Yes                                      | No                                          |

**Table S2.** Fracture energy analysis of different AVG expressed as mJ/mm<sup>3</sup>

|                         | <b>ePTFE</b> | <b>PEGDA</b> | <b>ACMO</b> |
|-------------------------|--------------|--------------|-------------|
| <b>Tensile Strength</b> | 85.34409     | 21.18079     | 146.83013   |
| <b>Suture Retention</b> | 5.36547      | 0.24382      | 3.59071     |
